# Supplementary material for: Acute Toxicity of the Dinoflagellate Amphidinium carterae on Early Life Stages of Zebrafish (Danio rerio)
Source: MDPI journal article supplement (doi:10.3390/toxics11040370), 2023-04-13

Supplementary materials

# Acute Toxicity of the Dinoflagellate *Amphidinium carterae* on Early Life Stages of Zebrafish (*Danio rerio*)

Xiao Yang <sup>1,2</sup>, Zhi Yan <sup>1,3</sup>, Jingjing Chen <sup>1,4</sup>, Derui Wang <sup>1,5</sup> and Ke Li <sup>1,6,\*</sup>

**Figure S1.** Single mass composition analysis of amphidinol 18 (A), amphidinol 19 (B) and amphidinol 2 (C).

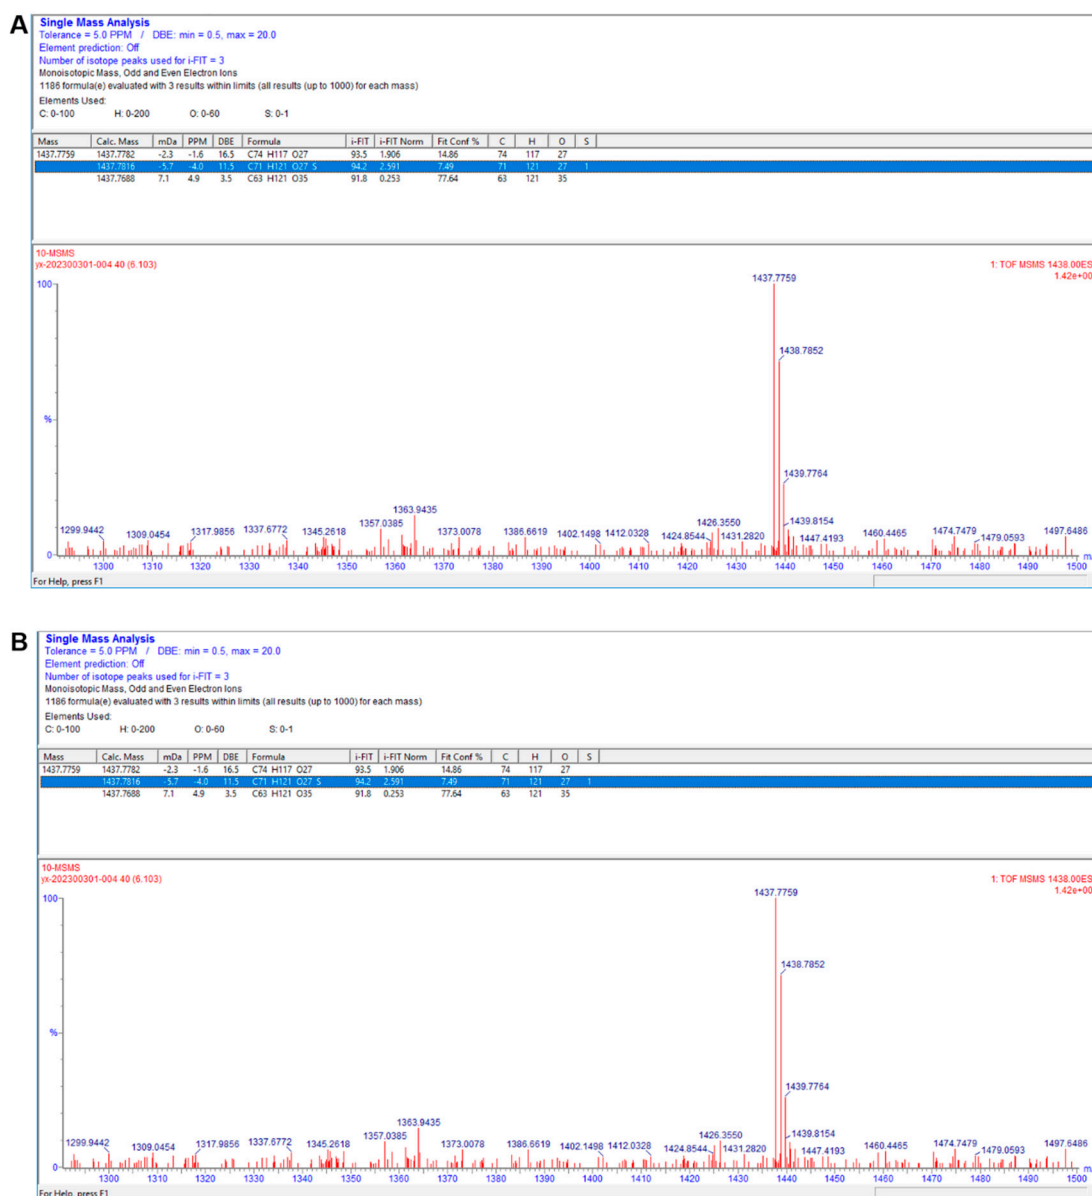

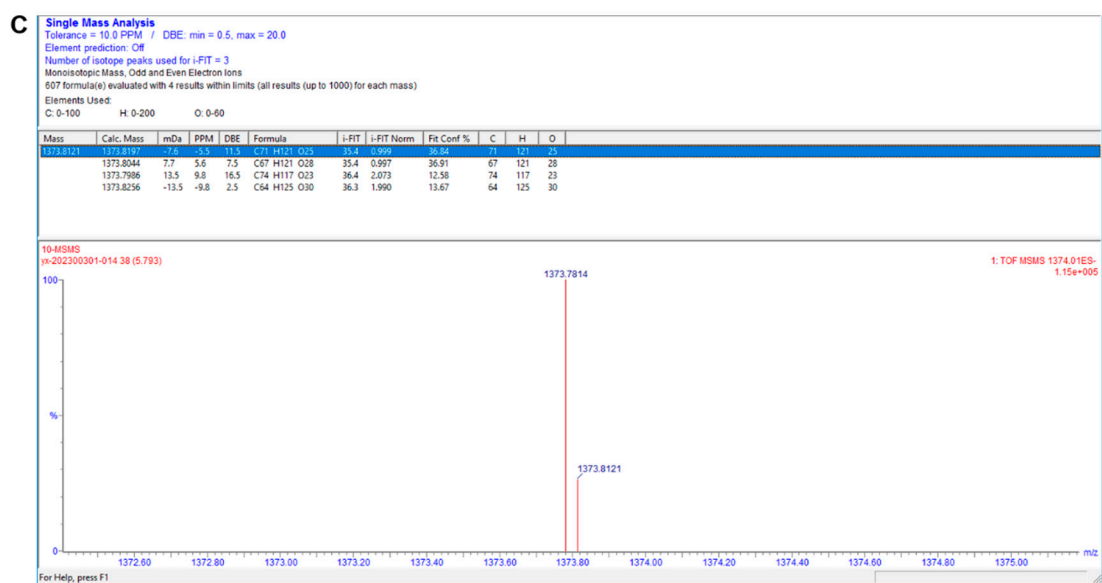

Supplement: s1 [file s1]
